# Supplementary material for: Plasma-etched CeO2 nanorods with rich defect sites and acidity for dichloroethane oxidation
Source: Royal Society of Chemistry journal article supplement (doi:10.1039/d2en00951j), 2023-01-01
Supplement: d2en00951j1.pdf [file d2en00951j1.pdf]

## Supplementary Information

### Plasma-Etched CeO<sub>2</sub> Nanorods with Rich Defect Sites and Acidity for Dichloroethane Oxidation

*Can Huo<sup>a</sup>, Fan Xue<sup>a</sup>, Jinlin Jiang<sup>a</sup>, Ming Xia<sup>a</sup>, Qing Liu<sup>a</sup>, Mifen Cui<sup>\*a</sup>, Yuan Pan<sup>b</sup>,  
Zhaoyang Fei<sup>\*a</sup> and Xu Qiao<sup>a</sup>*

<sup>a</sup> State Key Laboratory of Materials-Oriented Chemical Engineering, College of  
Chemical Engineering, Nanjing Tech University, Nanjing 211816, PR China

<sup>b</sup> State Key Laboratory of Heavy Oil Processing, College of Chemical Engineering,  
China University of Petroleum, Qingdao 266580, PR China

\*E-mail: zhaoyangfei@njtech.edu.cn (Z. Fei)

\*E-mail: mfcui@njtech.edu.cn (M. Cui)

## Figures

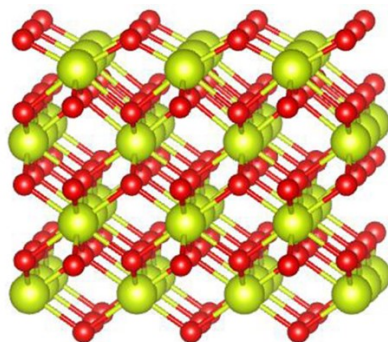

**Fig. S1** The model surfaces of CeO<sub>2</sub> (001). Yellow and red spheres represent cerium and oxygen ions, respectively.

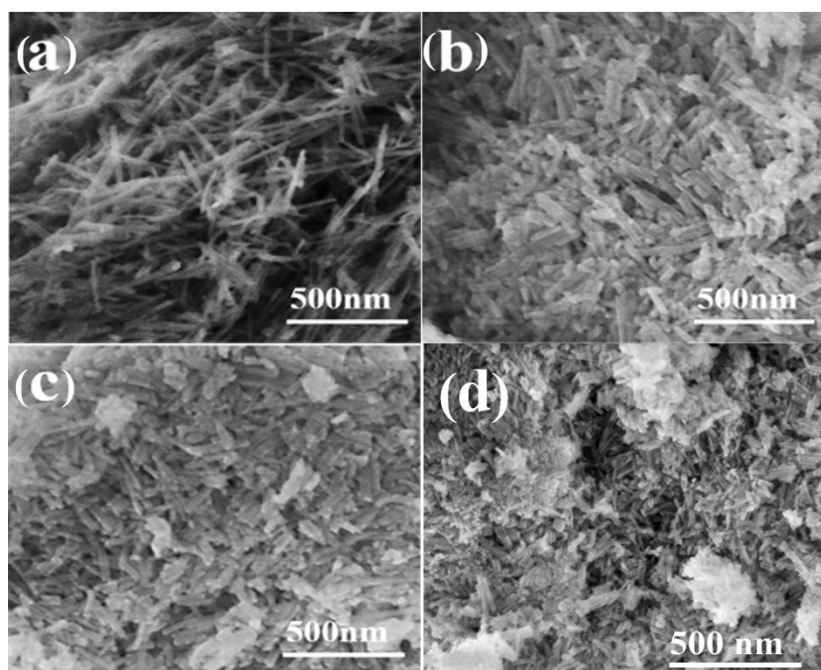

**Fig. S2** SEM images of (a) T-CeO<sub>2</sub>, (b) 20P-CeO<sub>2</sub>, (c) 40P-CeO<sub>2</sub>, and (d) 60P-CeO<sub>2</sub>.

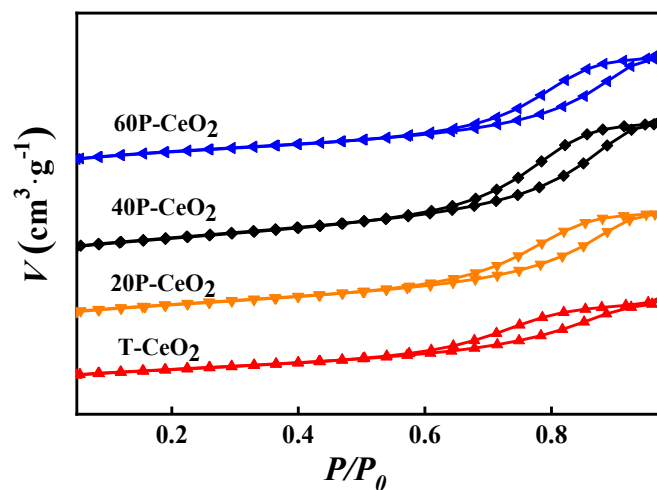

**Fig.S3** N<sub>2</sub> adsorption-desorption isotherms of the T-CeO<sub>2</sub> and *n*P-CeO<sub>2</sub> catalysts.

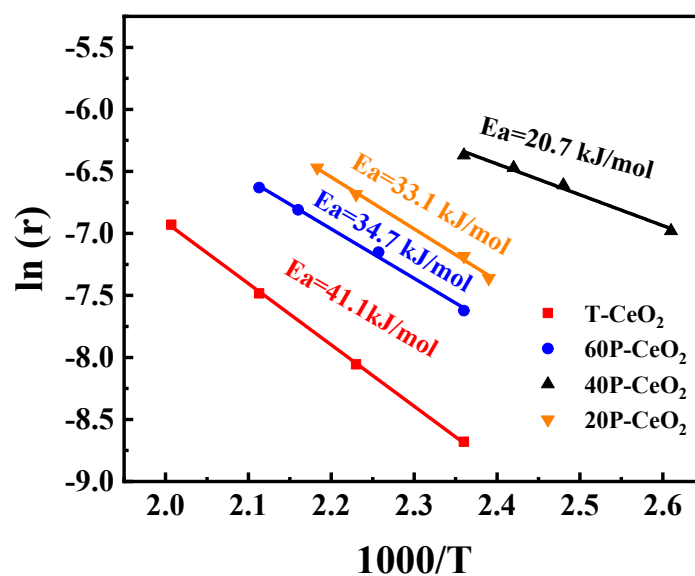

**Fig.S4** Arrhenius plots of  $\ln(r)$  versus  $1000/T$  for the T-CeO<sub>2</sub> and *n*P-CeO<sub>2</sub> catalysts in the catalytic reaction of DCE with GHSV at 20000 h<sup>-1</sup>.

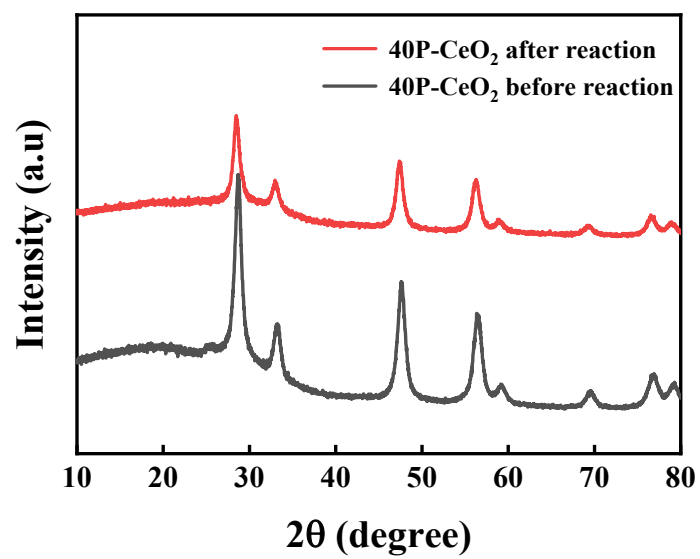

**Fig. S5** XRD patterns recorded for the 40P-CeO<sub>2</sub> samples before and after reaction.

## Table

**Table S1** Comparisons of  $T_{50}$  and  $T_{90}$

| Sample                                               | $T_{50}$ (°C) | $T_{90}$ (°C) | GHSV ( $\text{h}^{-1}$ ) | References |
|------------------------------------------------------|---------------|---------------|--------------------------|------------|
| 40P-CeO <sub>2</sub>                                 | 215           | 290           | 20000                    | This work  |
| T-CeO <sub>2</sub>                                   | 299           | 374           | 20000                    | This work  |
| Al <sub>2</sub> O <sub>3</sub> -CeO <sub>2</sub>     | 315           | 385           | 15000                    | 1          |
| AlCe50/50-NC                                         | 315           | 385           | 15000                    | 1          |
| 3DOM LSFCO                                           | 416           | 496           | 48000                    | 2          |
| 10Co <sub>3</sub> O <sub>4</sub> /3DOM               | 390           | 478           | 48000                    | 2          |
| Co <sub>3</sub> O <sub>4</sub>                       | 380           | 465           | 15000                    | 3          |
| RuO <sub>x</sub> /Co <sub>3</sub> O <sub>4</sub> -HP | 266           | 304           | 60000                    | 4          |
| RuO <sub>x</sub> /Co <sub>3</sub> O <sub>4</sub> -DP | 274           | 313           | 60000                    | 4          |
| RuO <sub>x</sub> /Co <sub>3</sub> O <sub>4</sub>     | 280           | 315           | 60000                    | 4          |
| Ru/WO <sub>3</sub>                                   | 285           | 320           | 40000                    | 5          |
| ZnCo <sub>2</sub> O <sub>4</sub>                     | 276           | 375           | 48000                    | 6          |
| Nb <sub>2</sub> O <sub>5</sub> -TiO <sub>2</sub>     | 246           | 295           | 15000                    | 7          |
| CeO <sub>2</sub> -PrO <sub>2</sub>                   | 318           | 375           | 30000                    | 8          |

## References

- 1 S.X. Bai, B.B. Shi, W. Deng, Q.G. Dai, X.Y. Wang, Catalytic oxidation of 1,2-dichloroethane over Al<sub>2</sub>O<sub>3</sub>-CeO<sub>2</sub> catalysts: combined effects of acid and redox properties, *RSC. Adv.*, 2015, **5**, 48916.
- 2 M.J. Tian, C. He, Y.K. Yu, H. Pan, L. Smith, Z.Y. Jiang, N.B. Gao, Y.F. Jian, Z.P. Hao, Q. Zhu, Catalytic oxidation of 1,2-dichloroethane over three-dimensional ordered meso-macroporous Co<sub>3</sub>O<sub>4</sub>/La<sub>0.7</sub>Sr<sub>0.3</sub>Fe<sub>0.5</sub>Co<sub>0.5</sub>O<sub>3</sub>: Destruction route and mechanism, *Appl. Catal. A: Gen.*, 2018, **553**, 1-14.

- 3 B. de Rivas, R. Lopez-Fonseca, C. Jimenez-Gonzalez, I. Jose, G. Ortize, Synthesis, characterisation and catalytic performance of nanocrystalline  $\text{Co}_3\text{O}_4$  for gas-phase chlorinated VOC abatement, *J. Catal.*, 2011, **281**, 88-97.
- 4 W. Deng, Z.Y. Jia, B. Gao, S.M. Zhu, D.Q. Liu, L.M. Guo, Effect of preparation method on the performance of porous  $\text{RuO}_x/\text{Co}_3\text{O}_4$  catalysts for 1,2-dichloroethane oxidation, *Appl. Catal. A: Gen.*, 2021, **624**, 118300.
- 5 X.H. Yu, L.Y. Dai, J.G. Deng, Y.X. Liu, L. Jing, X. Zhang, R.Y. Gao, Z.Q. Hou, L. Wei, H.X. Dai, An isotopic strategy to investigate the role of water vapor in the oxidation of 1,2-dichloroethane over the  $\text{Ru}/\text{WO}_3$  or  $\text{Ru}/\text{TiO}_2$  catalyst, *Appl. Catal. B: Environ.*, 2022, **305**, 121037.
- 6 Z.H. Chen, Z.P. Ye, H. Pan, X. Ling, J. Chen, X.M. Zhang, Bifunctional  $\text{ZnCo}_2\text{O}_4$  catalyst for  $\text{NO}_x$  reduction and 1,2-dichloroethane, *Catal. Commun.*, 2022, **166**, 106452.
- 7 P. Yang, J. Li, L.F. Bao, X. Zhou, X.W. Zhang, S.K. Fan, Z.Y. Chen, S.F. Zuo, C.Z. Qi, Adsorption/catalytic combustion of toxic 1,2-dichloroethane on multifunctional, *Chem. Eng. J.*, 2019, **361**, 1400-1410.
- 8 B. de Rivas, N. Guillén-Hurtado, R. López-Fonseca, F. Coloma-Pascual, A. García-García, J.I. Gutiérrez-Ortiz, A. Bueno-López, Activity, selectivity and stability of praseodymium-doped  $\text{CeO}_2$  for chlorinated VOCs catalytic combustion, *Appl. Catal. B-Environ.*, 2012, **121-122**, 162–170.
